# Supplementary material for: A 20-Country Comparative Assessment of the Effectiveness of Nutri-Score vs. NutrInform Battery Front-of-Pack Nutritional Labels on Consumer Subjective Understanding and Liking
Source: MDPI journal article supplement (doi:10.3390/nu15132852), 2023-06-23
Supplement: s1 [file s1]

**Table S1. Secondary data across 10 EU countries: T-test of subjective understanding and liking level.**

|                   | Italy (N=200)           |      |         |       | France (N=341)                                                         |      |         |       | Germany (N=330) |      |         |       | Greece (N=440) |      |         |       | Italy (N=368)    |      |         |       |
|-------------------|-------------------------|------|---------|-------|------------------------------------------------------------------------|------|---------|-------|-----------------|------|---------|-------|----------------|------|---------|-------|------------------|------|---------|-------|
|                   | NIB                     | NS   | T-value | P     | NIB                                                                    | NS   | T-value | P     | NIB             | NS   | T-value | P     | NIB            | NS   | T-value | P     | NIB              | NS   | T-value | P     |
| Comprehensibility | 5.60                    | 5.10 | 2.74    | <0.01 | 4.92                                                                   | 4.62 | 1.84    | 0.07  | 5.20            | 4.60 | 3.31    | <0.01 | 5.08           | 4.06 | 7.20    | <0.01 | 5.06             | 4.40 | 4.09    | <0.01 |
| Help to shop      | 5.50                    | 4.90 | 3.22    | <0.01 | 4.82                                                                   | 4.27 | 3.15    | <0.01 | 5.08            | 4.23 | 4.80    | <0.01 | 4.88           | 3.84 | 7.04    | <0.01 | 5.09             | 4.09 | 5.78    | <0.01 |
| Complexity        | 5.20                    | 4.50 | 3.53    | <0.01 | 4.67                                                                   | 4.07 | 3.37    | <0.01 | 4.80            | 4.20 | 3.09    | <0.01 | 4.50           | 3.50 | 6.84    | <0.01 | 4.81             | 3.78 | 5.78    | <0.01 |
| Liking level      | 5.60                    | 5.10 | 2.85    | <0.01 | 4.89                                                                   | 5.05 | 1.03    | 0.30  | 4.80            | 4.95 | 0.70    | 0.48  | 4.77           | 4.48 | 2.18    | <0.05 | 5.07             | 4.47 | 3.50    | <0.01 |
|                   | Portugal (N=417)        |      |         |       | Romania (N=440)                                                        |      |         |       | Spain (N=440)   |      |         |       | Poland (N=424) |      |         |       | Slovenia (N=153) |      |         |       |
|                   | NIB                     | NS   | T-value | P     | NIB                                                                    | NS   | T-value | P     | NIB             | NS   | T-value | P     | NS             | NIB  | T-value | P     | NS               | NIB  | T-value | P     |
| Comprehensibility | 5.02                    | 4.24 | 7.03    | <0.01 | 5.35                                                                   | 4.84 | 3.51    | <0.01 | 5.03            | 4.58 | 3.02    | <0.01 | 4.44           | 5.27 | -5.60   | <0.01 | 3.27             | 4.92 | -7.46   | <0.01 |
| Help to shop      | 5.10                    | 3.90 | 8.50    | <0.01 | 5.40                                                                   | 4.80 | 4.46    | <0.01 | 5.06            | 4.20 | 5.57    | <0.01 | 4.46           | 5.34 | -5.47   | <0.01 | 3.37             | 5.00 | -7.21   | <0.01 |
| Complexity        | 4.60                    | 3.50 | 7.52    | <0.01 | 5.07                                                                   | 4.20 | 4.73    | <0.01 | 4.65            | 3.76 | 5.46    | <0.01 | 4.21           | 5.16 | -5.72   | <0.01 | 2.52             | 3.99 | -6.07   | <0.01 |
| Liking level      | 5.04                    | 3.45 | 11.02   | <0.01 | 5.30                                                                   | 5.20 | 0.80    | 0.42  | 4.95            | 4.70 | 1.58    | 0.12  | 4.96           | 5.12 | -1.15   | 0.13  | 4.50             | 4.96 | -2.61   | 0.01  |
|                   | The Netherlands (N=245) |      |         |       | <b>Note:</b> NutrInfom Battery=NIB; Nutri-Score=NS<br>[15, 24, 35, 40] |      |         |       |                 |      |         |       |                |      |         |       |                  |      |         |       |
|                   | NS                      | NIB  | T-value | P     |                                                                        |      |         |       |                 |      |         |       |                |      |         |       |                  |      |         |       |
| Comprehensibility | 4.31                    | 4.98 | -3.80   | <0.01 |                                                                        |      |         |       |                 |      |         |       |                |      |         |       |                  |      |         |       |
| Help to shop      | 2.75                    | 4.41 | -8.86   | <0.01 |                                                                        |      |         |       |                 |      |         |       |                |      |         |       |                  |      |         |       |
| Complexity        | 2.43                    | 3.59 | 6.43    | <0.01 |                                                                        |      |         |       |                 |      |         |       |                |      |         |       |                  |      |         |       |
| Liking level      | 4.41                    | 4.32 | -4.17   | 0.01  |                                                                        |      |         |       |                 |      |         |       |                |      |         |       |                  |      |         |       |

**Figure S1. Template of front-of-pack labels in the comparative studies**

**Nutri Score label template**

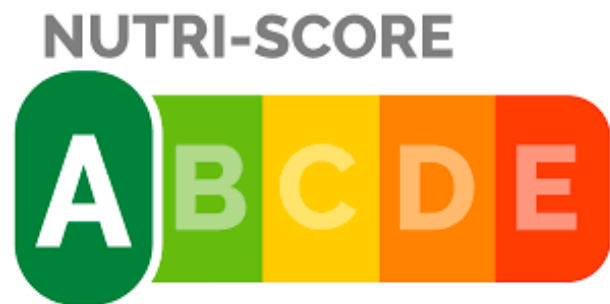

**NutrInform Battery label template**

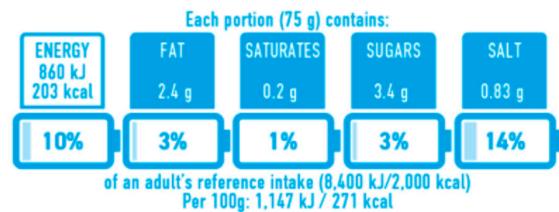

**Table S2. Obesity Rate in the 20 EU member countries**

|               |         |         |                |                 |         |          |         |          |        |         |
|---------------|---------|---------|----------------|-----------------|---------|----------|---------|----------|--------|---------|
| Country       | Austria | Belgium | Czech Republic | Denmark         | Estonia | Finland  | France  | Germany  | Greece | Hungary |
| Obesity level | 52.20%  | 50.20%  | 60.00%         | 50.40%          | 56.70%  | 59.00%   | 47.20%  | 53.50%   | 57.60% | 59.90%  |
| Country       | Ireland | Italy   | Latvia         | the Netherlands | Poland  | Portugal | Romania | Slovenia | Spain  | Sweden  |
| Obesity level | 54.40%  | 45.70%  | 58.30%         | 50.00%          | 58.10%  | 55.90%   | 58.70%  | 58.10%   | 53.70% | 51.30%  |
